# Supplementary material
Source: Springer Nature journal article supplement (https://www.springermedizin.de/resource/supplementary/12913_2013_2684_MOESM1_ESM.pdf/9531122)
Supplement: MOESM1 [file 9531122]

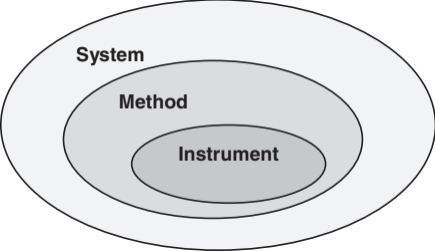

**System:**

Methods embedded in the organisational structure that measures, gives feedback, and provides follow-up

**Method:**

A combination of instruments and activities of professionals that measure and analyse patient safety

**Instrument:**

An analysis tool to measure aspects of patient safety
